# Supplementary material for: The stability and activity of human neuroserpin are modulated by a salt bridge that stabilises the reactive centre loop
Source: PubMed Central journal article supplement (PMC4556959; doi:10.1038/srep13666), 2015-09-02
Supplement: srep13666-s1.pdf [file srep13666-s1.pdf]

## SUPPORTING INFORMATION

### The stability and activity of human neuroserpin is modulated by a salt bridge that stabilises the reactive centre loop

Rosina Noto<sup>1</sup>, Loredana Randazzo<sup>1</sup>, Samuele Raccosta<sup>1</sup>, Sonia Caccia<sup>2</sup>, Claudia Moriconi<sup>3</sup>, Elena Miranda<sup>3</sup>, Vincenzo Martorana<sup>1</sup>, and Mauro Manno<sup>1,\*</sup>

<sup>1</sup>National Research Council of Italy, Institute of Biophysics, Palermo, Italy

<sup>2</sup>Department of Medical Biotechnologies and Translational Medicine, University of Milan, Milan, Italy

<sup>3</sup>Department of Biology and Biotechnologies "Charles Darwin" and Pasteur Institute - Cenci Bolognetti Foundation, Sapienza University of Rome, Rome, Italy

\*[mauro.manno@cnr.it](mailto:mauro.manno@cnr.it)

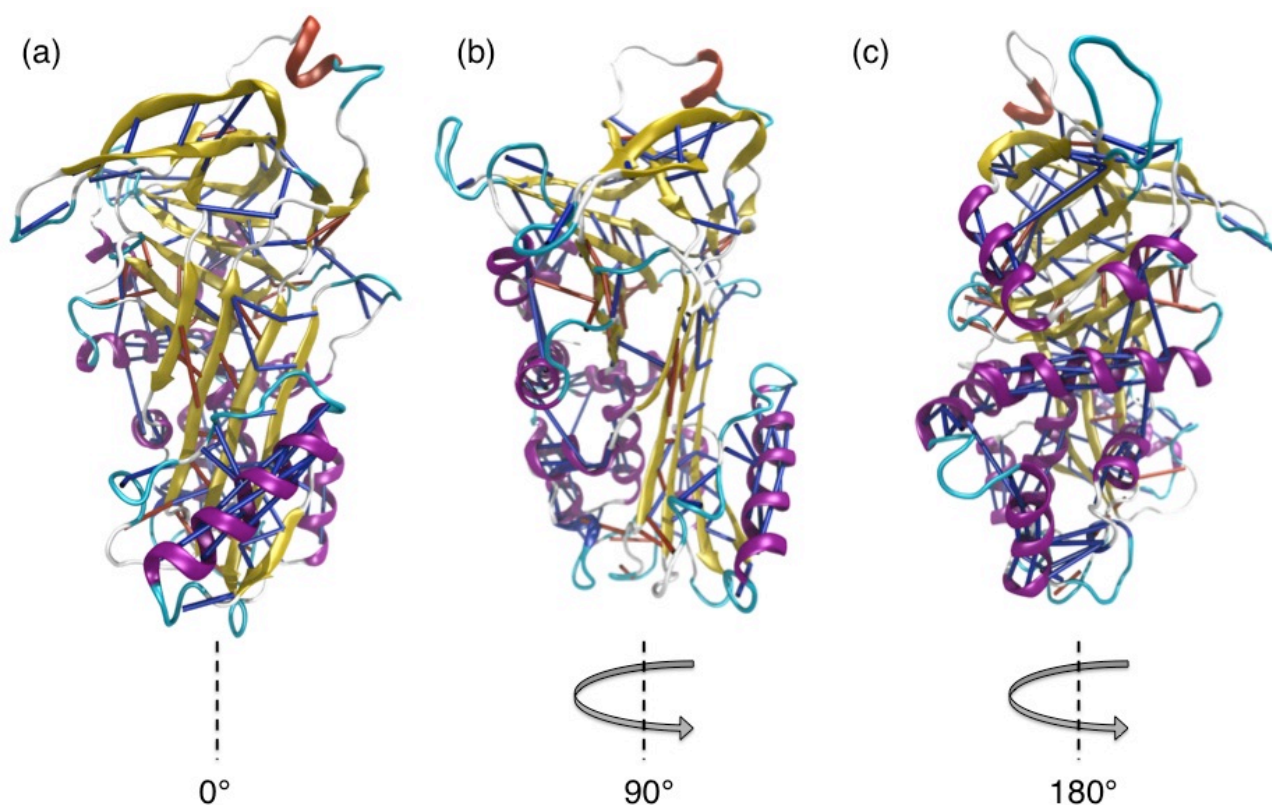

**Supporting Figure S1.** Cartoon representation of WT NS showing a selection of hydrogen bonds (HBs) as blue and red sticks. (a) Frontal view with the F-helix on the foreground; (b) 90° rotation with respect to (a); (c) 180° rotation with respect to (a). Blue sticks: HBs that in WT NS have an occupancy time higher than 50% with respect to the occupancy time in E289A NS. Red sticks: HBs that in E289A NS have an occupancy time higher than 50% with respect to the occupancy time in WT NS.
